# Supplementary material for: Changes in Domestic Energy and Water Usage during the UK COVID-19 Lockdown Using High-Resolution Temporal Data
Source: MDPI journal article supplement (doi:10.3390/ijerph18136818), 2021-06-25
Supplement: s1 [file s1]

**Supplementary material:**

**Changes in domestic energy and water usage during the UK COVID-19 lockdown using high-resolution temporal data**

*Table S1: Sensor information for each type of utility usage and air measurement.*

| Sensor data type    | Sensor model                                              | Sampling interval                                                 | Measurement accuracy or operation notes                                                                                                                                                                                            |
|---------------------|-----------------------------------------------------------|-------------------------------------------------------------------|------------------------------------------------------------------------------------------------------------------------------------------------------------------------------------------------------------------------------------|
| Electricity         | ISL 067 Smart RF Mk2 3-phase wireless meter (ref: QC0142) | Readings recorded every 3 minutes.                                | $\pm 10\%$                                                                                                                                                                                                                         |
| Gas                 | Pulse transmitter (ref: QC0145b)                          | Count of the number of pulses generated per 7.5 minutes.          | In line with equipment it is connected to.                                                                                                                                                                                         |
| Water               | Pulse transmitter (ref: QC0145c)                          | Count of the number of pulses generated per 7.5 minutes.          | In line with equipment it is connected to.                                                                                                                                                                                         |
| Indoor temperature  | Ultra-RF for Temperature and humidity (ref: QC0160)       | Readings recorded every 3 minutes. Update rate every 7.5 minutes. | $\pm 0.5^{\circ}\text{C}$                                                                                                                                                                                                          |
| Outdoor temperature | Invisible Systems External AQ Monitor                     | Readings recorded every 30 minutes.                               | $\pm 0.3^{\circ}\text{C}$                                                                                                                                                                                                          |
| Gateway             | Boxed ISL058 gateway                                      |                                                                   | RF transmitters connect to sensors and send data to the infrastructure internet connected Gateway on site. The Gateway stores and transfers the data to the Realtime Online cloud server over a secure mobile cellular connection. |

*Table S2: Descriptive statistics for each relevant covariate, for each group of homes with electricity, gas and water usage measurements in the first lockdown.*

*Notes:*  $N$  is the number of homes in the group for the given measure.

|                          | Electricity usage ( $N = 50$ ) |            | Gas ( $N = 8$ ) |            | Water ( $N = 14$ ) |            |
|--------------------------|--------------------------------|------------|-----------------|------------|--------------------|------------|
| Covariate                | Mean (SD)                      | Min, max   | Mean (SD)       | Min, max   | Mean (SD)          | Min, max   |
| Household size           | 1.7 (0.9)                      | 1, 6       | 1.3 (0.5)       | 1, 2       | 1.5 (0.7)          | 1, 3       |
| Under-18s or Employed    | 0.2 (0.5)                      | 0, 2       | 0.1 (0.4)       | 0, 1       | 0.2 (0.4)          | 0, 1       |
| Time indoors             | 20.5 (2.7)                     | 12, 24     | 20.6 (3.3)      | 14, 24     | 19.9 (2.9)         | 13, 24     |
| Electrical appliances    | 7.9 (3.1)                      | 1, 13      |                 |            |                    |            |
| Electricity smart meter  | 0.2 (0.4)                      | 0, 1       |                 |            |                    |            |
| Number of rooms          | 5.4 (1.0)                      | 4, 8       | 5.6 (1.3)       | 4, 8       | 6.1 (1.2)          | 4, 8       |
| Property type (0 = flat) | 0.4 (0.5)                      | 0, 1       | 0.1 (0.4)       | 0, 1       | 0.4 (0.5)          | 0, 1       |
| Fuel poverty             | 0.5 (0.7)                      | 0, 3       | 0.3 (0.5)       | 0, 1       | 0.4 (0.9)          | 0, 3       |
| Indoor temperature       | 20.9 (2.1)                     | 16.3, 25.5 | 22.2 (1.2)      | 20.8, 23.7 | 20.8 (2.2)         | 16.6, 23.7 |
| IMD rank                 | 2882.8 (3695.6)                | 606 ,11981 | 3297.4 (3668.6) | 964 ,9855  | 3665.6 (4012.5)    | 606 ,10826 |

Notes for the following Tables S3 to S7:

Significance  $^+p \leq 0.10$ ,  $*p \leq 0.05$ ,  $**p \leq 0.01$ ,  $***p \leq 0.001$ .

$N$  is the number of homes in the group for the given measure;  $NObs$  is the total number of sensor data points used as the outcome in the regression that includes period as a factor =  $N \times 2 \text{ years} \times 2 \text{ periods} \times 24 \text{ hours}$ .

CE is the Coefficient estimate;  $t$  or  $F$  is the  $t$  value from the regression or, where noted, is an  $F$  value;  $p$  is the  $p$  value.

The CE provides the rate of change over different values of the variable. The reference year was 2019, so the CE represents the change from 2019 to 2020, and the reference period was advice, so the CE represents the change from the advice to the instruction period. The reference hour differed across regression models, and was chosen to be the hour at which there was the minimum absolute difference between the two years, which allows any differences between the years for each hour to be detected by the interaction.

Year, Period and Hour are repeated measures factors.  $F$  and  $p$  values are reported from the overall ANOVA for the interaction model. For Year and Period, coefficient estimates are reported from the main effects model given that the interaction model provides the estimate for the reference level of Hour. For Hour, the main effects regression model provides estimates for 23 levels versus the reference level, so estimates are not included. For the independent measures, all values (coefficient estimate,  $t$  and  $p$ ) are reported from the interaction model.

In the main text, percentage increases in electricity usage with every unit increase in the predictor are reported for log-transformed outcomes, using CE to provide the multiplier,  $e^{CE}$ .

Table S3: Electricity usage regression model outputs for the first lockdown.  $N = 50$ ;  $NObs = 4800$ .

| Predictor                        | Both periods           |              |           | Advice period          |              |           | Instruction period     |              |           |
|----------------------------------|------------------------|--------------|-----------|------------------------|--------------|-----------|------------------------|--------------|-----------|
|                                  | Reference Hour = 22:00 |              |           | Reference Hour = 12:00 |              |           | Reference Hour = 17:00 |              |           |
|                                  | CE                     | $t$ or $F$   | $p$       | CE                     | $t$ or $F$   | $p$       | CE                     | $t$ or $F$   | $p$       |
| Year (reference = 2019)          | 0.031                  | $F = 1.687$  | 0.200     | 0.041                  | $F = 2.226$  | 0.142     | 0.022                  | $F = 0.852$  | 0.361     |
| Period (reference = advice)      | -0.028                 | $F = 8.429$  | **0.006   |                        |              |           |                        |              |           |
| Hour                             |                        | $F = 45.874$ | ***<0.001 |                        | $F = 41.156$ | ***<0.001 |                        | $F = 42.552$ | ***<0.001 |
| Household size                   | 0.210                  | 2.259        | *0.030    | 0.216                  | 2.298        | *0.027    | 0.203                  | 2.202        | *0.034    |
| Under-18s or Employed            | 0.049                  | 0.298        | 0.767     | 0.036                  | 0.217        | 0.829     | 0.062                  | 0.378        | 0.707     |
| Time indoors                     | 0.020                  | 0.734        | 0.467     | 0.024                  | 0.843        | 0.404     | 0.017                  | 0.618        | 0.540     |
| Electrical appliances            | 0.032                  | 1.356        | 0.183     | 0.032                  | 1.334        | 0.190     | 0.032                  | 1.369        | 0.179     |
| Electricity smart meter          | 0.081                  | 0.468        | 0.642     | 0.101                  | 0.576        | 0.568     | 0.061                  | 0.356        | 0.724     |
| Number of rooms                  | 0.017                  | 0.247        | 0.806     | 0.018                  | 0.269        | 0.789     | 0.015                  | 0.224        | 0.824     |
| Property type (reference = flat) | 0.463                  | 3.280        | **0.002   | 0.463                  | 3.244        | **0.002   | 0.462                  | 3.294        | **0.002   |
| Fuel poverty                     | 0.097                  | 1.143        | 0.260     | 0.096                  | 1.107        | 0.275     | 0.099                  | 1.172        | 0.248     |
| Indoor temperature               | -0.010                 | 0.308        | 0.760     | -0.012                 | 0.358        | 0.723     | -0.009                 | 0.256        | 0.799     |
| IMD rank                         | 0.000                  | 0.579        | 0.566     | 0.000                  | 0.668        | 0.508     | 0.000                  | 0.483        | 0.632     |

Table S3 (continued): Electricity usage regression model outputs for the first lockdown.

| Predictor            | Both periods |             |         | Advice period |             |       | Instruction period |             |          |
|----------------------|--------------|-------------|---------|---------------|-------------|-------|--------------------|-------------|----------|
|                      | CE           | $t$ or $F$  | $p$     | CE            | $t$ or $F$  | $p$   | CE                 | $t$ or $F$  | $p$      |
| Year x Period        |              | $F = 1.894$ | 0.169   |               |             |       |                    |             |          |
| Year x Hour          |              | $F = 1.818$ | **0.010 |               | $F = 1.068$ | 0.375 |                    | $F = 2.165$ | ***0.001 |
| Period x Hour        |              | $F = 1.853$ | **0.008 |               |             |       |                    |             |          |
| Year x Period x Hour |              | $F = 1.155$ | 0.276   |               |             |       |                    |             |          |

Table S4: Gas usage regression model outputs for the first lockdown.  $N = 8$ ;  $NObs = 768$ .

| Predictor                   | Both periods           |              |                    | Advice period          |             |           | Instruction period     |             |          |
|-----------------------------|------------------------|--------------|--------------------|------------------------|-------------|-----------|------------------------|-------------|----------|
|                             | Reference Hour = 14:00 |              |                    | Reference Hour = 12:00 |             |           | Reference Hour = 09:00 |             |          |
|                             | CE                     | $t$ or $F$   | $p$                | CE                     | $t$ or $F$  | $p$       | CE                     | $t$ or $F$  | $p$      |
| Year (reference = 2019)     | 0.003                  | $F = 0.128$  | 0.732              | 0.027                  | $F = 9.084$ | **0.003   | -0.021                 | $F = 2.830$ | 0.136    |
| Period (reference = advice) | -0.024                 | $F = 4.658$  | <sup>+</sup> 0.068 |                        |             |           |                        |             |          |
| Hour                        |                        | $F = 2.783$  | ***<0.001          |                        | $F = 2.917$ | ***<0.001 |                        | $F = 2.384$ | ***0.001 |
| Year x Period               |                        | $F = 22.112$ | ***<0.001          |                        |             |           |                        |             |          |
| Year x Hour                 |                        | $F = 0.921$  | 0.570              |                        | $F = 0.715$ | 0.826     |                        | $F = 0.961$ | 0.518    |
| Period x Hour               |                        | $F = 1.279$  | 0.174              |                        |             |           |                        |             |          |
| Year x Period x Hour        |                        | $F = 0.810$  | 0.720              |                        |             |           |                        |             |          |

Table S5: Water usage regression model outputs for the first lockdown.  $N = 14$ ;  $NObs = 1344$ .

| Predictor                        | Both periods           |              |             | Advice period          |              |             | Instruction period     |              |             |
|----------------------------------|------------------------|--------------|-------------|------------------------|--------------|-------------|------------------------|--------------|-------------|
|                                  | Reference Hour = 04:00 |              |             | Reference Hour = 23:00 |              |             | Reference Hour = 21:00 |              |             |
|                                  | CE                     | $t$ or $F$   | $p$         | CE                     | $t$ or $F$   | $p$         | CE                     | $t$ or $F$   | $p$         |
| Year (reference = 2019)          | 0.003                  | $F = 4.852$  | 0.046       | 0.003                  | $F = 2.933$  | $^{+}0.088$ | 0.003                  | $F = 3.217$  | $^{+}0.096$ |
| Period (reference = advice)      | 0.004                  | $F = 8.603$  | 0.012       |                        |              |             |                        |              |             |
| Hour                             |                        | $F = 18.751$ | $***<0.001$ |                        | $F = 14.685$ | $***<0.001$ |                        | $F = 19.620$ | $***<0.001$ |
| Household size                   | 0.034                  | 2.331        | $^{+}0.059$ | 0.036                  | 2.450        | $^{*}0.050$ | 0.033                  | 2.207        | $^{+}0.069$ |
| Under-18s or Employed            | 0.033                  | 1.341        | 0.229       | 0.031                  | 1.266        | 0.253       | 0.035                  | 1.411        | 0.208       |
| Time indoors                     | 0.002                  | 0.652        | 0.539       | 0.003                  | 0.819        | 0.444       | 0.002                  | 0.486        | 0.644       |
| Number of rooms                  | 0.001                  | 0.111        | 0.915       | 0.000                  | 0.039        | 0.970       | 0.001                  | 0.182        | 0.861       |
| Property type (reference = flat) | -0.001                 | 0.027        | 0.979       | 0.002                  | 0.072        | 0.945       | -0.003                 | 0.125        | 0.905       |
| Fuel poverty                     | -0.008                 | 0.584        | 0.580       | -0.008                 | 0.556        | 0.598       | -0.009                 | 0.610        | 0.564       |
| Indoor temperature               | 0.004                  | 0.631        | 0.552       | 0.005                  | 0.717        | 0.500       | 0.004                  | 0.543        | 0.606       |
| Year x Period                    |                        | $F = 0.020$  | 0.888       |                        |              |             |                        |              |             |
| Year x Hour                      |                        | $F = 0.930$  | 0.558       |                        | $F = 0.669$  | 0.875       |                        | $F = 0.941$  | 0.544       |
| Period x Hour                    |                        | $F = 0.569$  | 0.949       |                        |              |             |                        |              |             |
| Year x Period x Hour             |                        | $F = 0.738$  | 0.809       |                        |              |             |                        |              |             |

Table S6: Electricity usage regression model outputs for periods after the first lockdown.

|                                  | Second lockdown ( $N = 33$ ) |              |           | Third lockdown ( $N = 21$ ) |              |           | Between lockdowns ( $N = 43$ ) |              |           |
|----------------------------------|------------------------------|--------------|-----------|-----------------------------|--------------|-----------|--------------------------------|--------------|-----------|
|                                  | Reference Year = 2019        |              |           | Reference Year = 2020       |              |           | Reference Year = 2019          |              |           |
|                                  | Reference Hour = 08:00       |              |           | Reference Hour = 20:00      |              |           | Reference Hour = 16:00         |              |           |
| Predictor                        | CE                           | $t$ or $F$   | $P$       | CE                          | $t$ or $F$   | $p$       | CE                             | $t$ or $F$   | $p$       |
| Year                             | 0.057                        | $F = 4.695$  | *0.038    | 0.086                       | $F = 5.176$  | *0.034    | 0.074                          | $F = 3.549$  | 0.067     |
| Hour (reference = 22:00)         |                              | $F = 33.095$ | ***<0.001 |                             | $F = 16.741$ | ***<0.001 |                                | $F = 39.134$ | ***<0.001 |
| Household size                   | 0.128                        | 0.878        | 0.389     | 0.280                       | 1.074        | 0.308     | 0.260                          | 2.242        | 0.308     |
| Under-18s or Employed            | 0.057                        | 0.269        | 0.790     | 0.265                       | 0.920        | 0.379     | 0.089                          | 0.500        | 0.379     |
| Time indoors                     | -0.005                       | 0.120        | 0.906     | -0.024                      | 0.367        | 0.721     | 0.024                          | 0.676        | 0.721     |
| Electrical appliances            | 0.048                        | 1.329        | 0.197     | 0.044                       | 1.107        | 0.294     | 0.044                          | 1.577        | 0.294     |
| Electricity smart meter          | 0.002                        | 0.007        | 0.994     | 0.211                       | 0.737        | 0.478     | 0.046                          | 0.270        | 0.478     |
| Number of rooms                  | 0.091                        | 0.797        | 0.434     | 0.054                       | 0.424        | 0.681     | -0.069                         | 0.738        | 0.681     |
| Property type (reference = flat) | 0.316                        | 1.376        | 0.183     | 0.221                       | 0.864        | 0.408     | 0.173                          | 1.090        | 0.408     |
| Fuel poverty                     | 0.139                        | 1.509        | 0.145     | 0.391                       | 2.400        | 0.037     | 0.170                          | 2.059        | 0.037     |
| Indoor temperature               | 0.013                        | 0.260        | 0.797     | 0.008                       | 0.156        | 0.879     | 0.003                          | 0.084        | 0.879     |
| IMD rank                         | 0.000                        | 1.289        | 0.211     | 0.000                       | 2.027        | 0.070     | 0.000                          | 0.270        | 0.070     |
| Year x Hour                      |                              | $F = 0.814$  | 0.716     |                             | $F = 0.773$  | 0.766     |                                | $F = 1.232$  | 0.207     |



Table S7: Water usage regression model outputs for periods after the first lockdown.

|                                  | Second lockdown ( $N = 12$ ) |              |           | Third lockdown ( $N = 11$ ) |              |           | Between lockdowns ( $N = 12$ ) |              |           |
|----------------------------------|------------------------------|--------------|-----------|-----------------------------|--------------|-----------|--------------------------------|--------------|-----------|
|                                  | Reference Year = 2019        |              |           | Reference Year = 2020       |              |           | Reference Year = 2019          |              |           |
|                                  | Reference Hour = 03:00       |              |           | Reference Hour = 00:00      |              |           | Reference Hour = 05:00         |              |           |
| Predictor                        | CE                           | $t$ or $F$   | $p$       | CE                          | $t$ or $F$   | $p$       | CE                             | $t$ or $F$   | $p$       |
| Year                             | -0.001                       | $F = 0.048$  | 0.830     | 0.002                       | $F = 0.667$  | 0.433     | -0.001                         | $F = 0.664$  | 0.433     |
| Hour                             |                              | $F = 17.500$ | ***<0.001 |                             | $F = 13.276$ | ***<0.001 |                                | $F = 17.928$ | ***<0.001 |
| Household size                   | 0.006                        | 0.398        | 0.704     | 0.000                       | 0.029        | 0.978     | 0.002                          | 0.141        | 0.892     |
| Time indoors                     | -0.002                       | 0.807        | 0.451     | -0.002                      | 0.856        | 0.431     | -0.003                         | 1.001        | 0.355     |
| Number of rooms                  | -0.001                       | 0.084        | 0.936     | -0.002                      | 0.256        | 0.808     | -0.001                         | 0.231        | 0.825     |
| Property type (reference = flat) | -0.002                       | 0.120        | 0.909     | -0.002                      | 0.096        | 0.927     | -0.011                         | 0.607        | 0.566     |
| Indoor temperature               | 0.006                        | 1.341        | 0.229     | 0.007                       | 1.399        | 0.221     | 0.005                          | 1.301        | 0.241     |
| Year x Hour                      |                              | $F = 0.798$  | 0.733     |                             | $F = 1.857$  | *0.012    |                                | $F = 0.997$  | 0.469     |

*Table S8: Mean change in electricity usage from 2019 to 2020 in the instruction period of the first lockdown, split by binary categories according to the values of the covariates.*

| Covariate                                                    | Criterion for binary categorisation into Groups A and B, with B considered more likely for electricity usage to be affected by lockdown. | Group A mean ( <i>N</i> )<br>Figure 3 blue dashed lines | Group B mean ( <i>N</i> )<br>Figure 3 red solid lines | Mann-Whitney <i>U</i> ( <i>p</i> ) |
|--------------------------------------------------------------|------------------------------------------------------------------------------------------------------------------------------------------|---------------------------------------------------------|-------------------------------------------------------|------------------------------------|
| Household size                                               | A: 1 or 2<br>B: 3 or more                                                                                                                | 0.006<br>(43)                                           | 0.000<br>(7)                                          | 138<br>(0.743)                     |
| Presence of occupants under 18 years of age or in employment | A: None known<br>B: At least one                                                                                                         | 0.005<br>(39)                                           | 0.007<br>(11)                                         | 217<br>(0.953)                     |
| Time normally spent indoors                                  | A: More than 16 hours<br>B: Up to 16 hours per day                                                                                       | 0.002<br>(44)                                           | 0.031<br>(6)                                          | 107<br>(0.474)                     |
| Electrical appliances                                        | A: Up to 8<br>B: More than 8                                                                                                             | 0.009<br>(25)                                           | 0.002<br>(25)                                         | 278<br>(0.503)                     |
| Presence of a smart meter                                    | A: Yes<br>B: No                                                                                                                          | -0.022<br>(9)                                           | 0.011<br>(41)                                         | 124<br>(0.131)                     |
| Number of rooms                                              | A: 4 or 5<br>B: 6 to 8                                                                                                                   | 0.013<br>(31)                                           | -0.007<br>(19)                                        | 245<br>(0.322)                     |
| Property type                                                | A: Flat<br>B: House or bungalow                                                                                                          | -0.001<br>(31)                                          | 0.016<br>(19)                                         | 284<br>(0.834)                     |
| Fuel poverty survey score                                    | A: 1 to 3<br>B: 0                                                                                                                        | -0.022<br>(17)                                          | 0.019<br>(33)                                         | 202<br>(0.108)                     |
| Mean indoor temperature                                      | A: up to 21 °C<br>B: above 21 °C                                                                                                         | 0.013<br>(25)                                           | -0.002<br>(25)                                        | 291<br>(0.677)                     |
| IMD rank                                                     | A: up to 1133<br>B: above 1133                                                                                                           | -0.004<br>(28)                                          | 0.018<br>(22)                                         | 395<br>(0.089)                     |

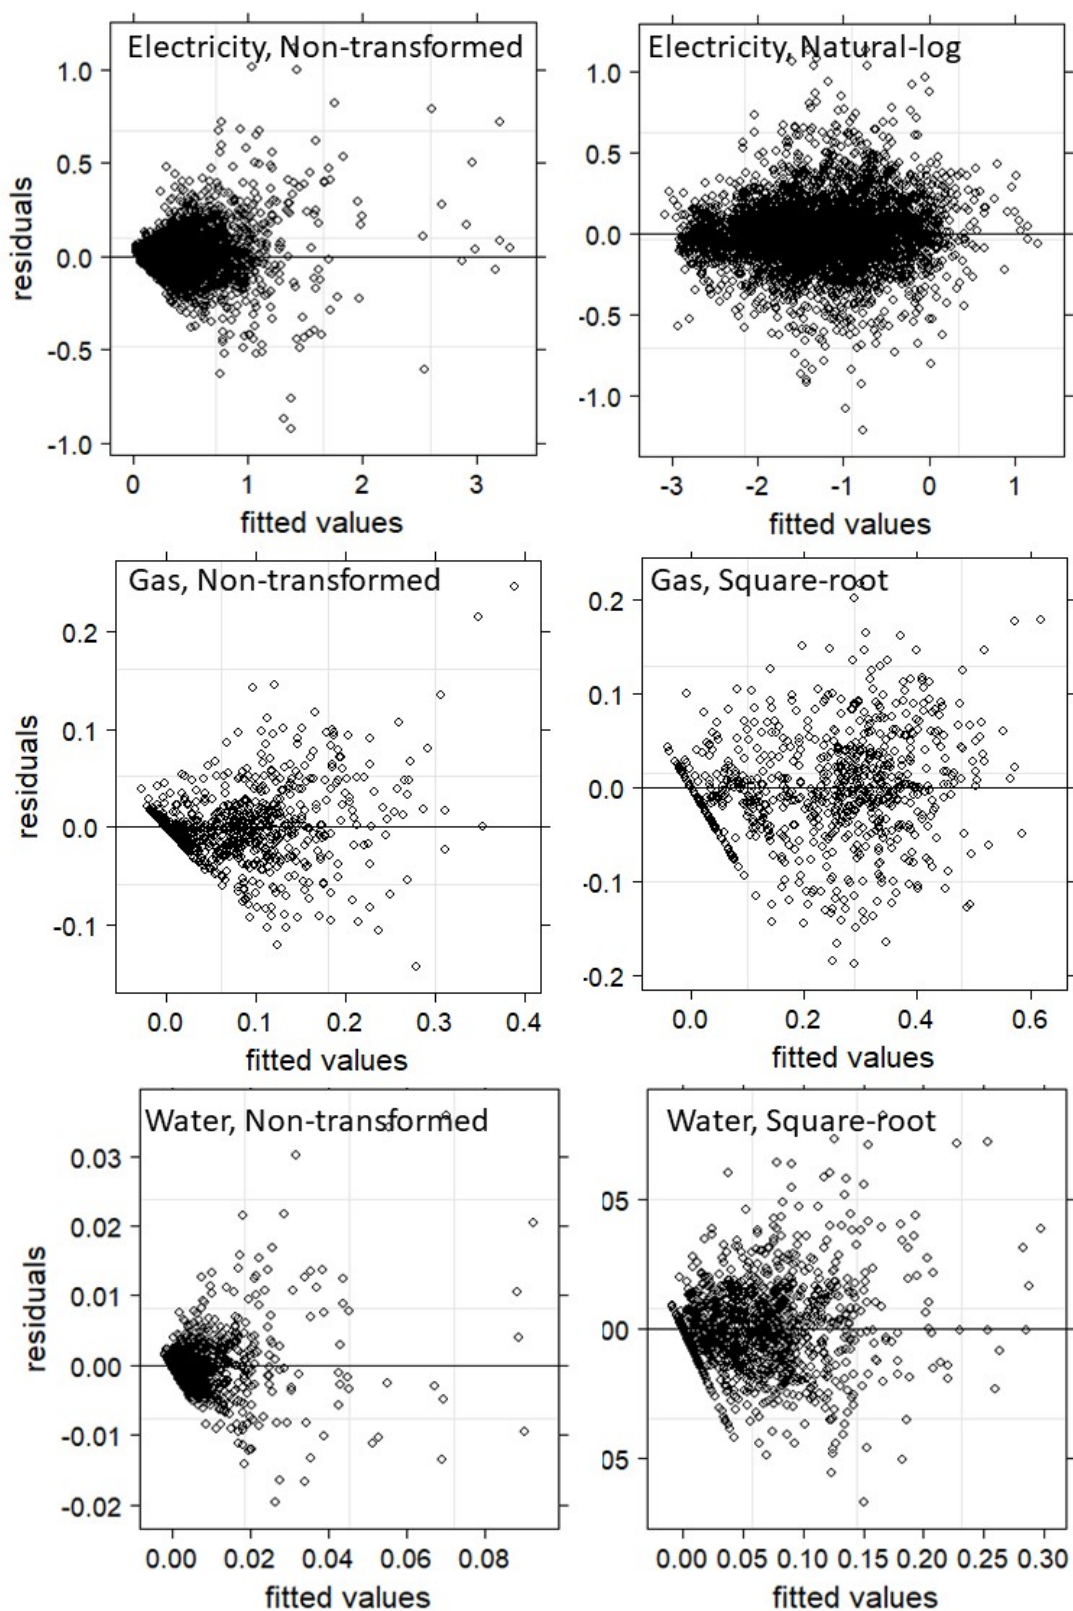

*Figure S1: Residuals as a function of the values fitted by the interaction regression model containing both advice and instruction periods for the first lockdown, for non-transformed and transformed electricity, gas and water usage.*
